# Supplementary material for: Novel 4-Azapregnene Derivatives as Potential Anticancer Agents: Synthesis, Antiproliferative Activity and Molecular Docking Studies
Source: MDPI journal article supplement (doi:10.3390/molecules27186126), 2022-09-19

# Novel 4-Azapregnene Derivatives as Potential Anticancer Agents: Synthesis, Antiproliferative Activity and Molecular Docking Studies

Vanessa Brito <sup>1</sup>, Adriana Oliveira Santos <sup>1</sup>, Gilberto Alves <sup>1</sup>, Paulo Almeida <sup>1</sup> and Samuel Silvestre <sup>1,2,\*</sup>

<sup>1</sup> Health Sciences Research Centre (CICS-UBI), Universidade da Beira Interior, Av. Infante D. Henrique, 6200-506, Covilhã, Portugal; vanessa.sofia.brito@ubi.pt (V.B.); aosantos@fcsaude.ubi.pt (A.O.S.); gilberto@fcsaude.ubi.pt (G.A.); pjsa@ubi.pt (P.A.)

<sup>2</sup> Center for Neuroscience and Cell Biology (CNC), University of Coimbra, 3004-517, Coimbra, Portugal

\* Correspondence: sms@ubi.pt

---

## Table of Contents

|                                                |    |
|------------------------------------------------|----|
| Structural characterization of novel compounds | S1 |
| Flow cytometry additional data                 | S2 |

---

# <sup>1</sup>H NMR spectrum of compound 3a

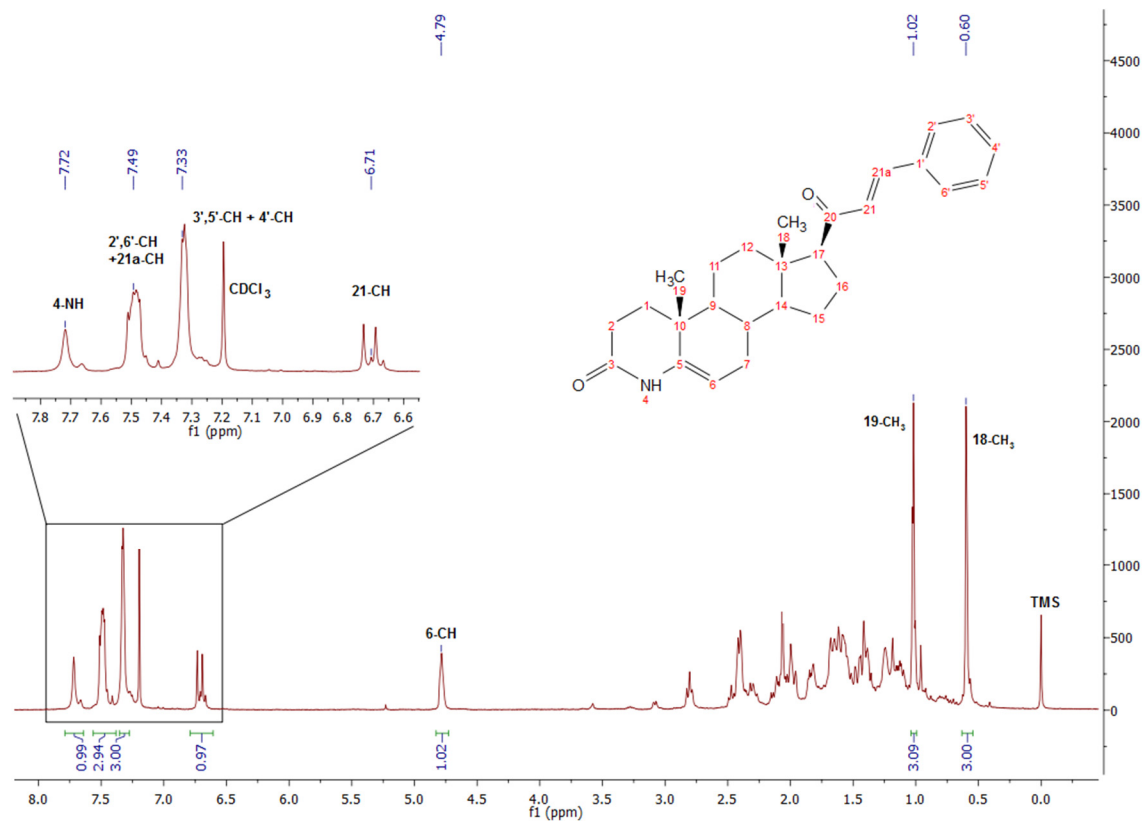

# <sup>13</sup>C NMR spectrum of compound 3a

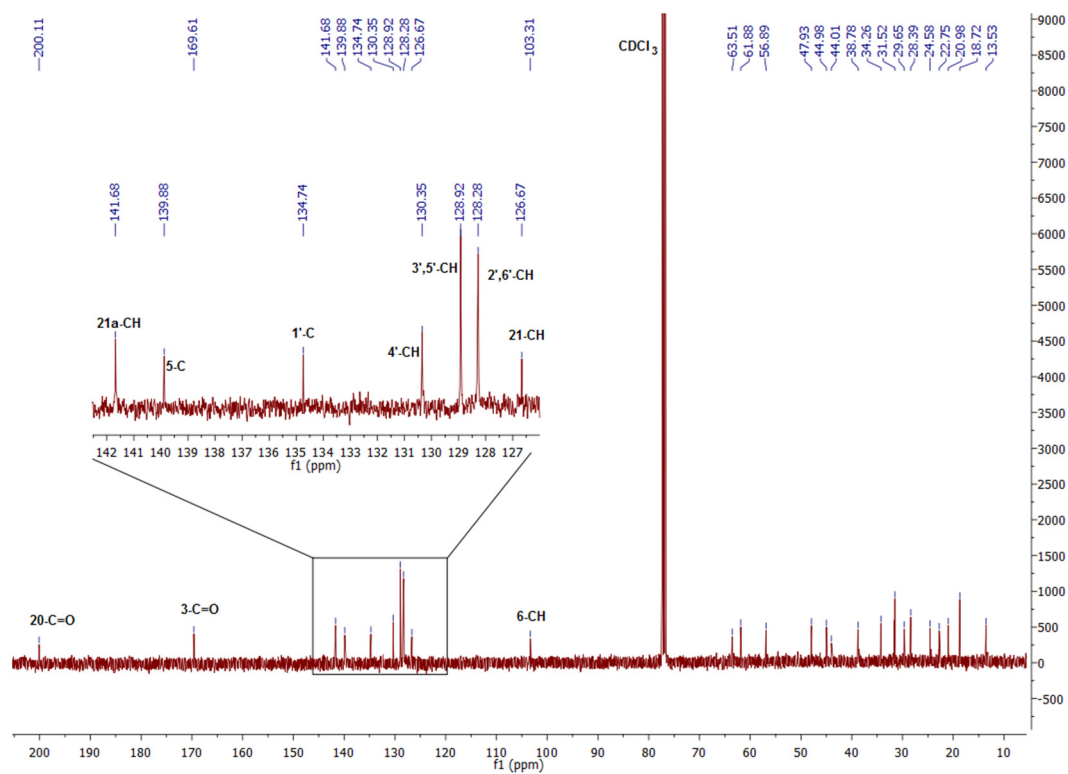

## IR spectrum of compound 3a

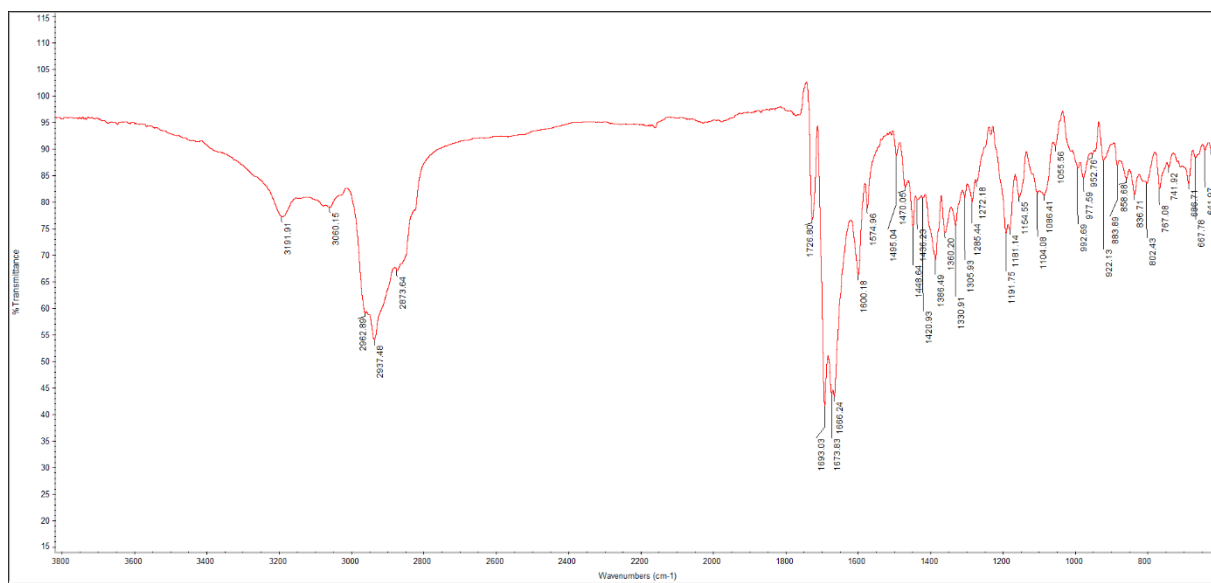

# <sup>1</sup>H NMR spectrum of compound 3b

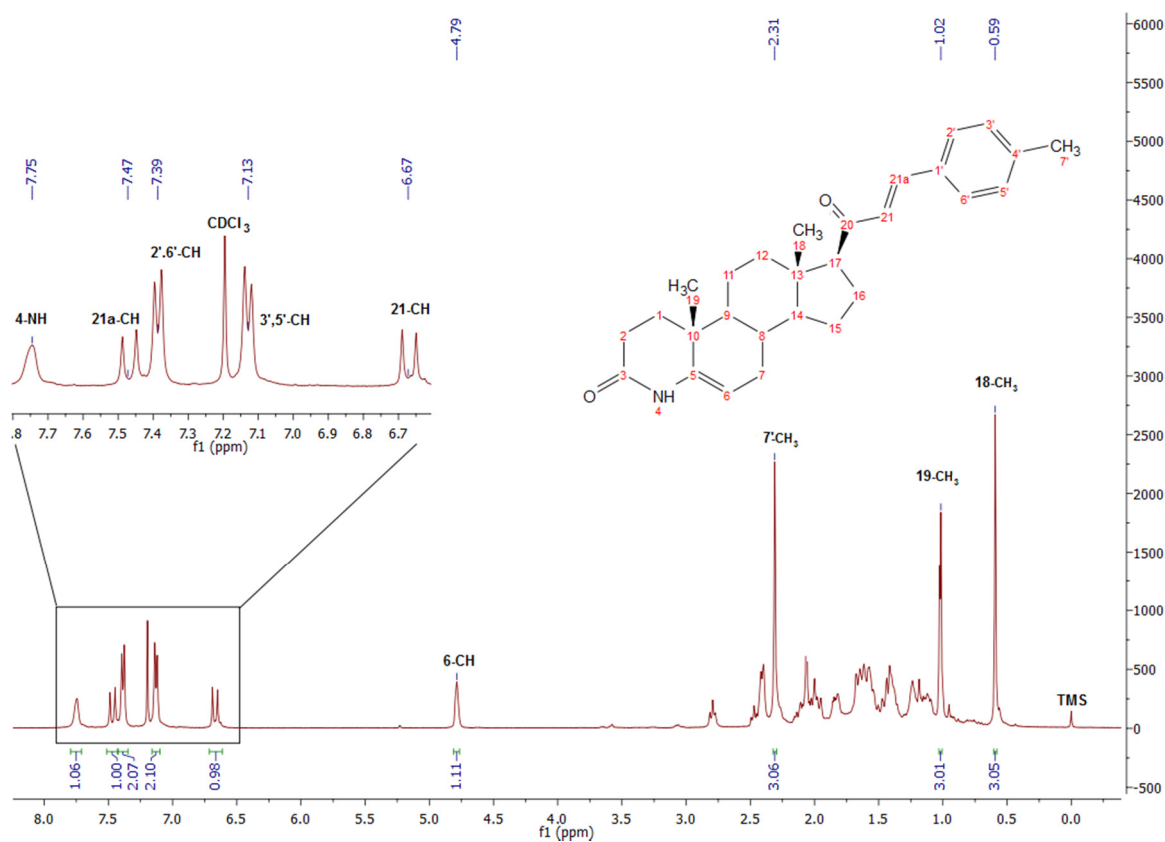

# <sup>13</sup>C NMR spectrum of compound 3b

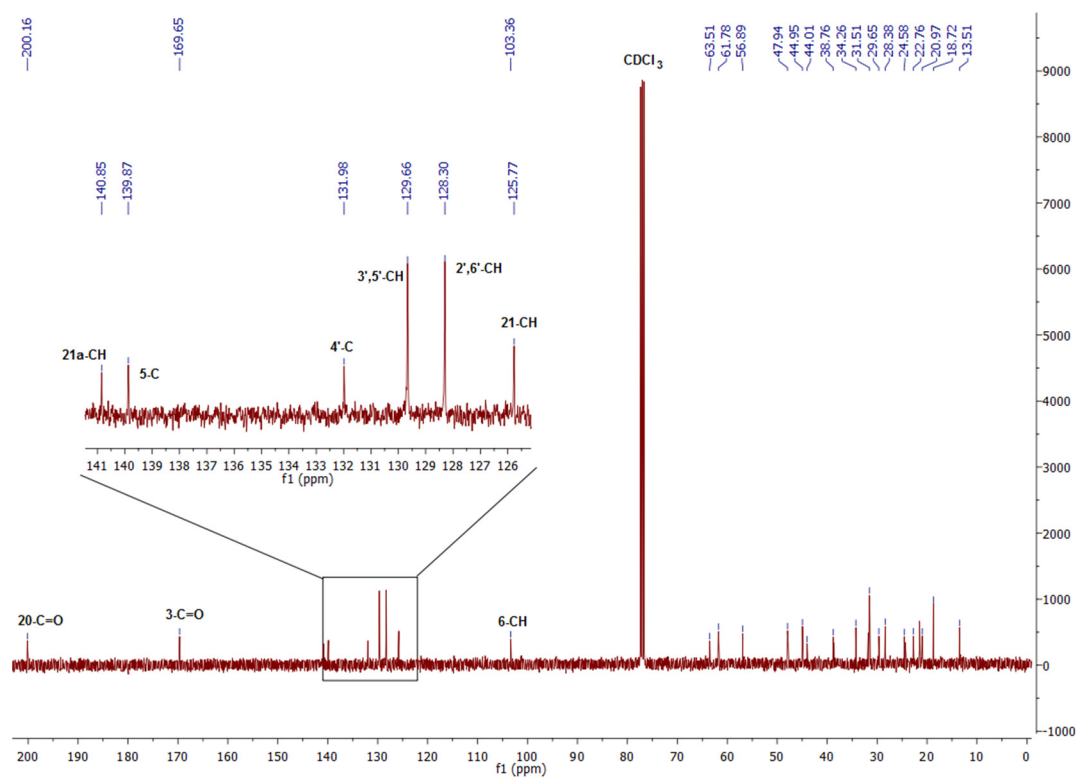

## IR spectrum of compound 3b

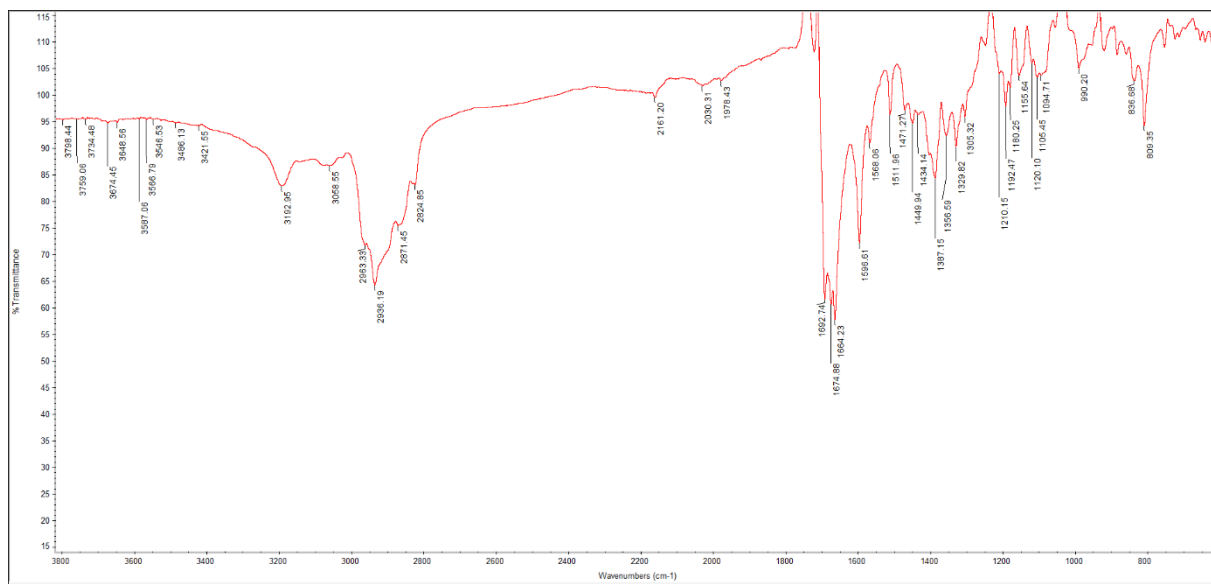

# <sup>1</sup>H NMR spectrum of compound 3c

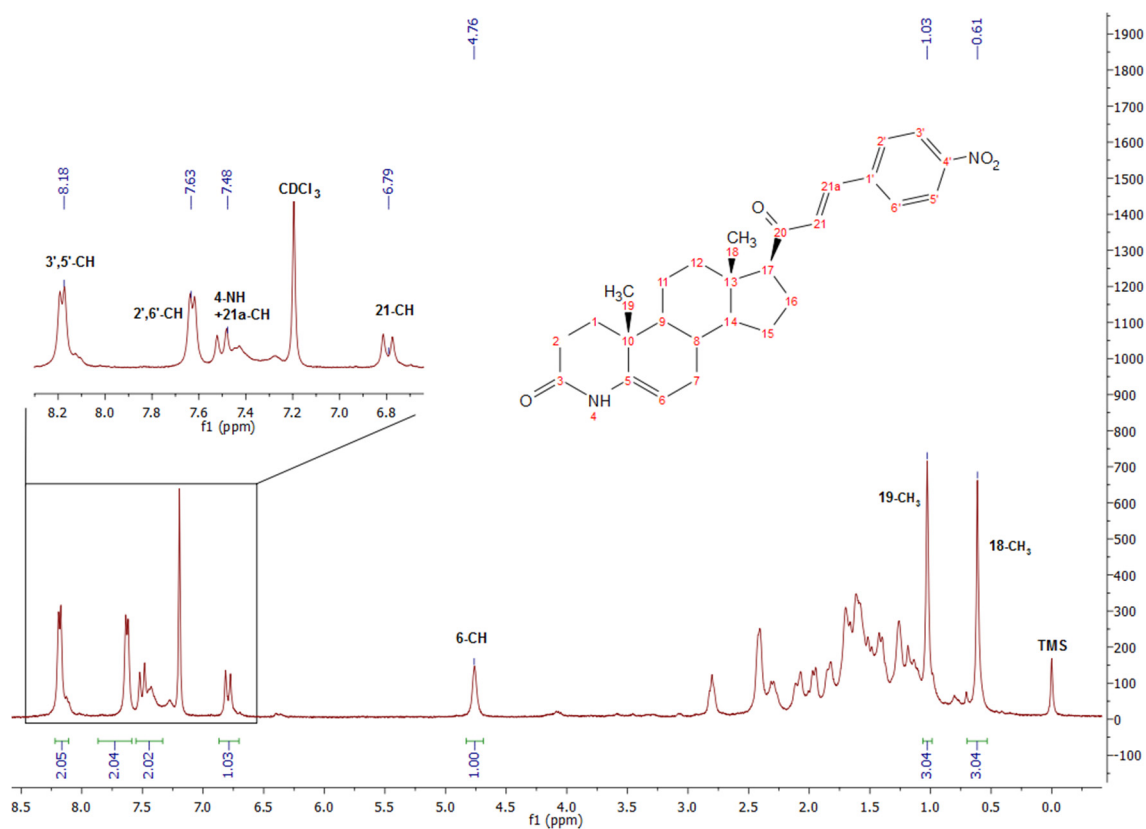

# <sup>13</sup>C NMR spectrum of compound 3c

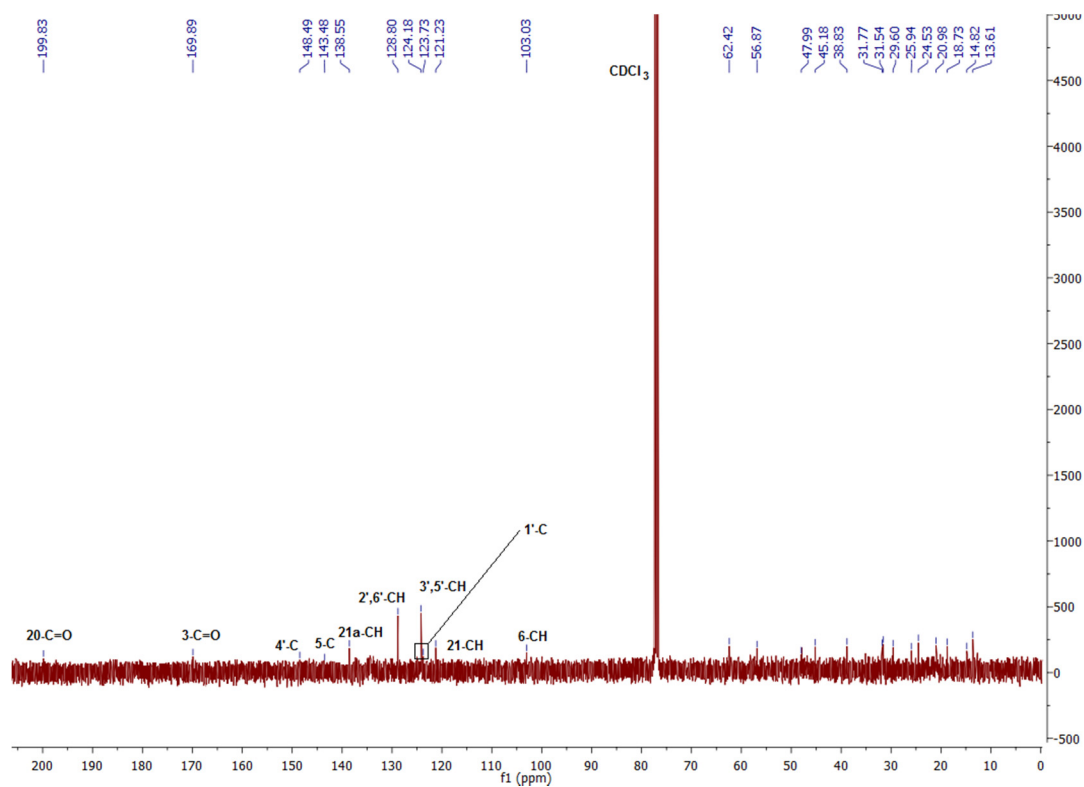

## IR spectrum of compound 3c

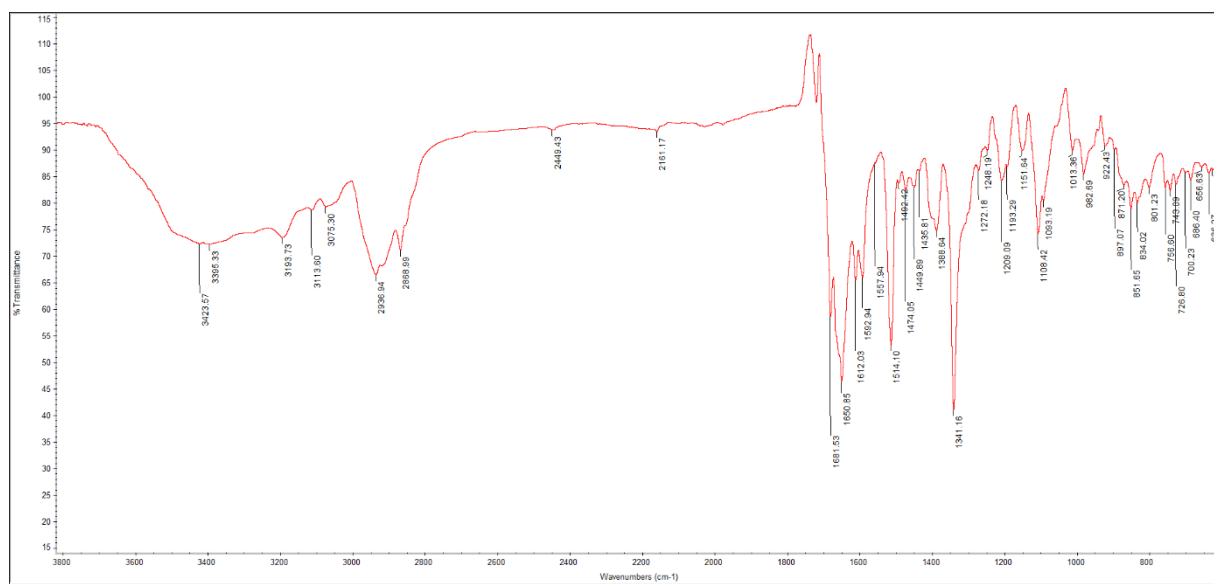

# <sup>1</sup>H NMR spectrum of compound 3d

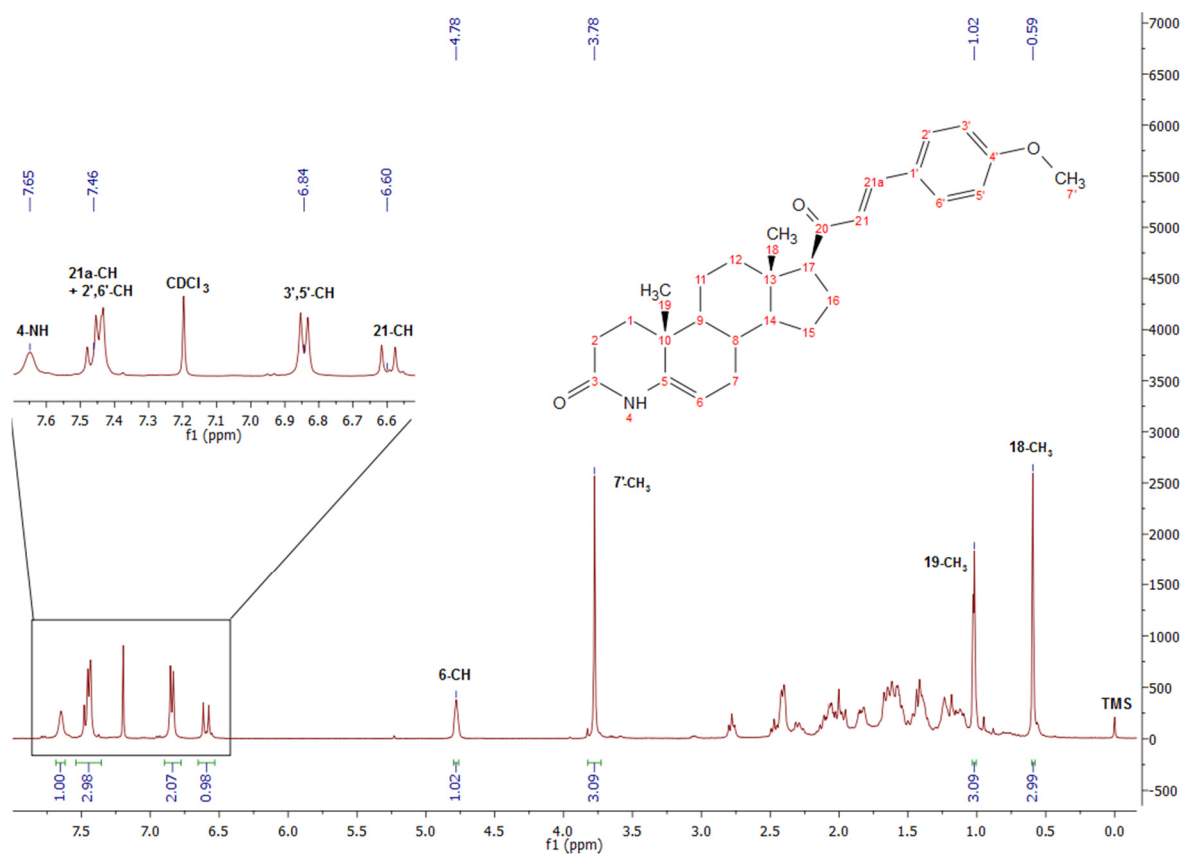

# <sup>13</sup>C NMR spectrum of compound 3d

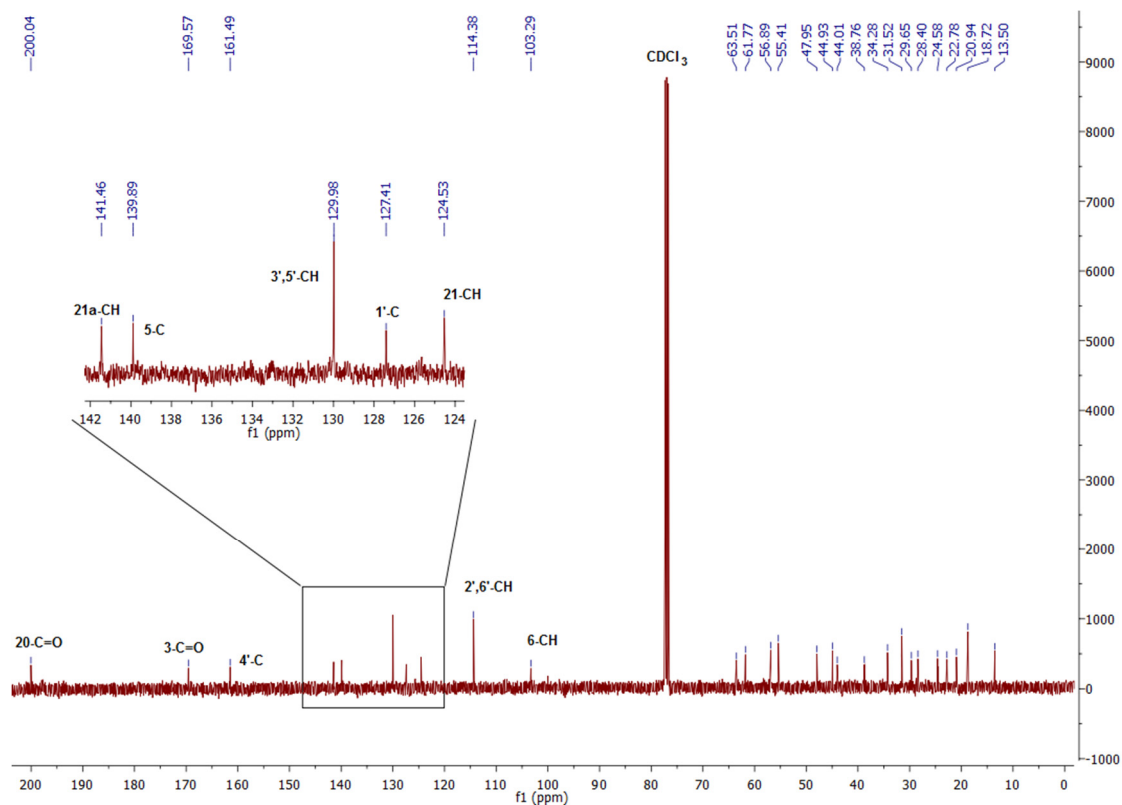



## IR spectrum of compound 3d

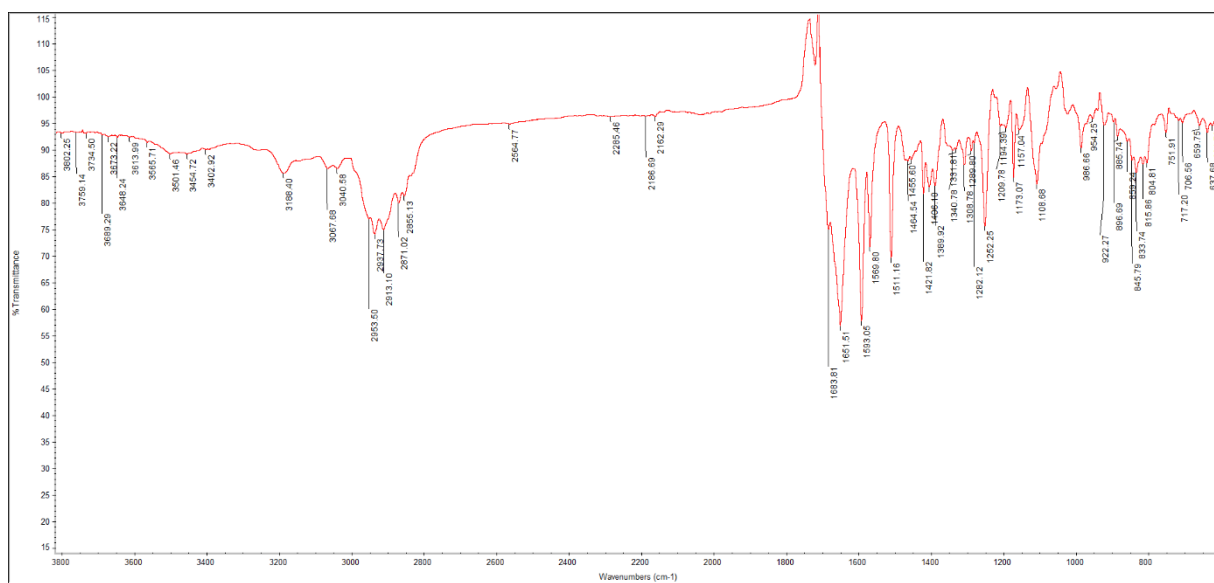

# <sup>1</sup>H NMR spectrum of compound 3e

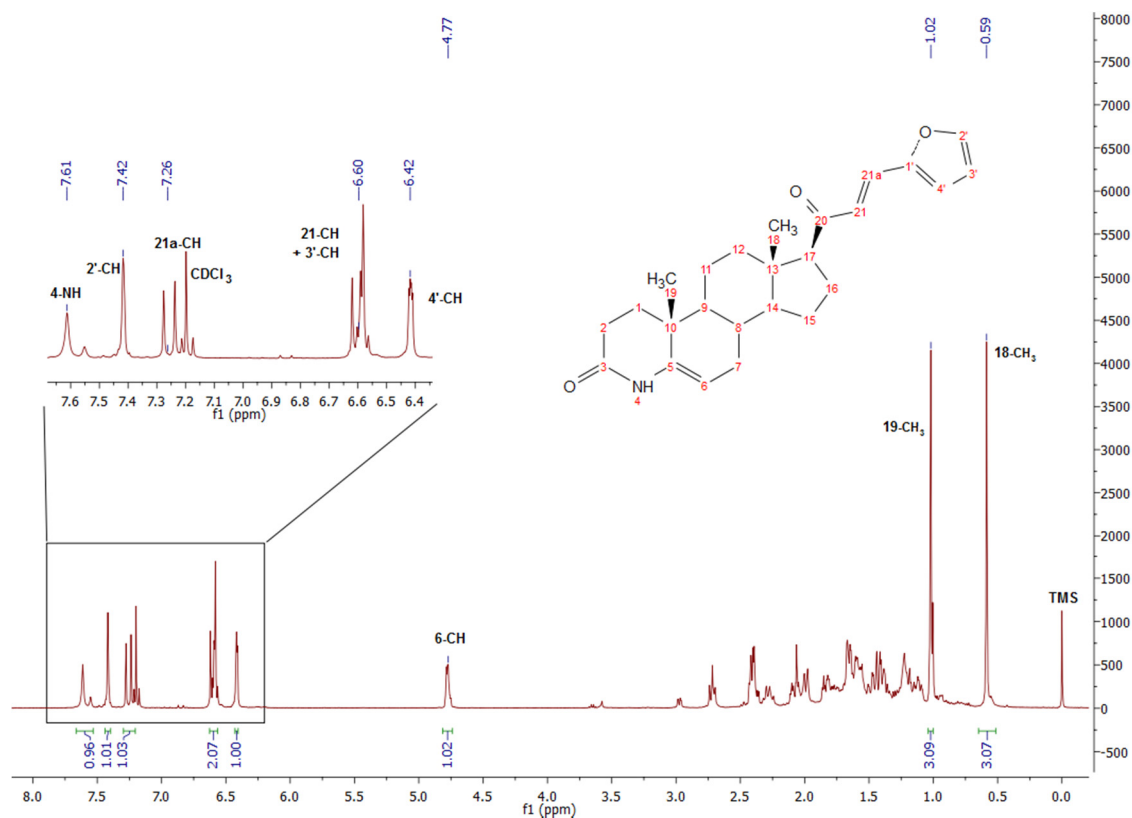

# <sup>13</sup>C NMR spectrum of compound 3e

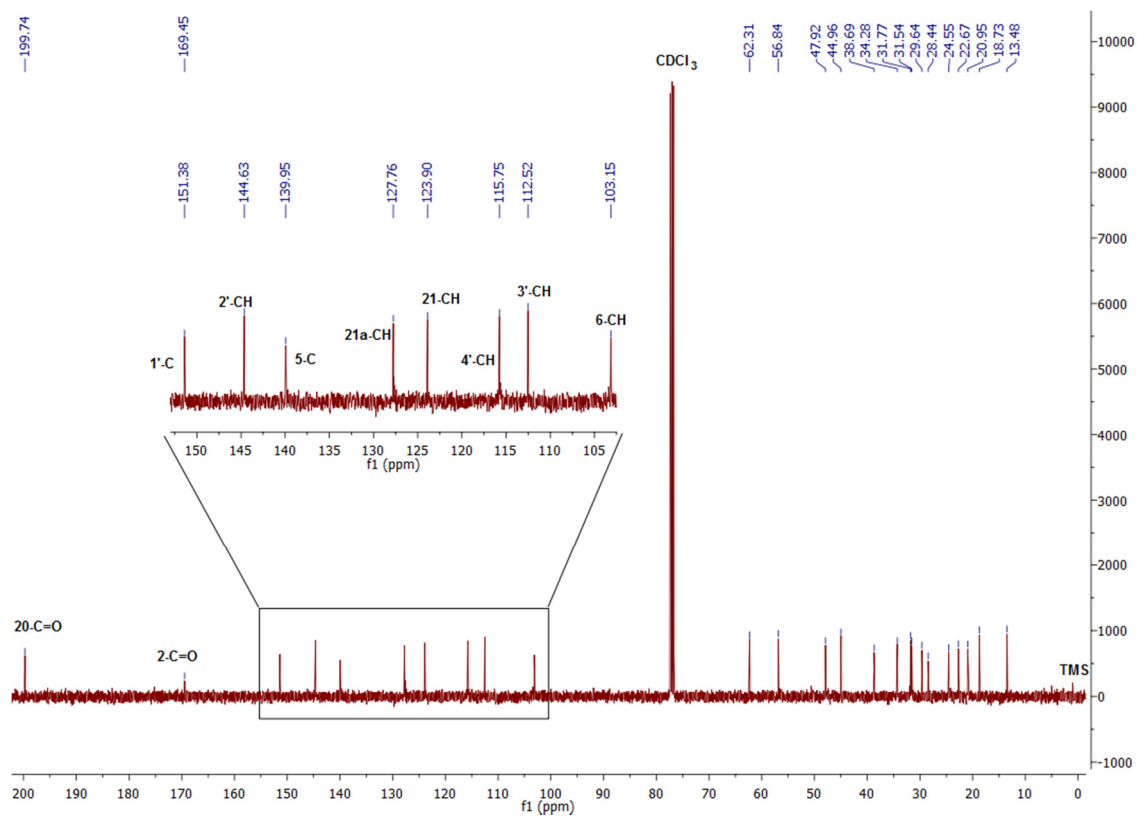

### IR spectrum of compound 3e

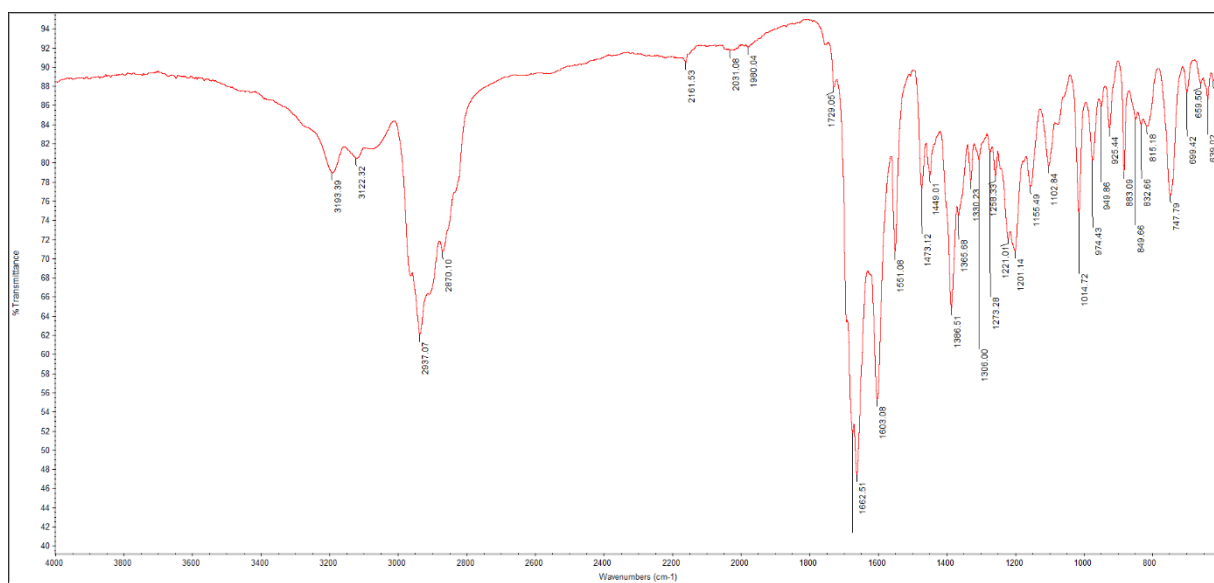

# <sup>1</sup>H NMR spectrum of compound 3f

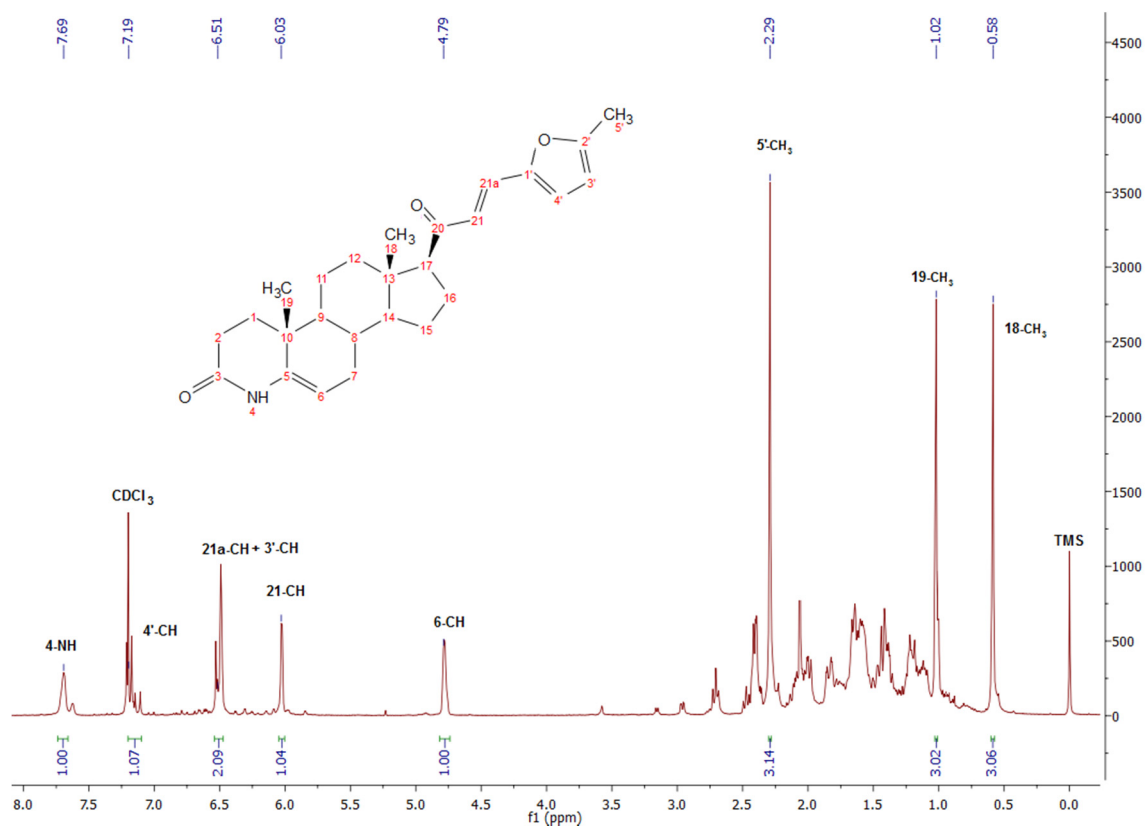

# <sup>13</sup>C NMR spectrum of compound 3f

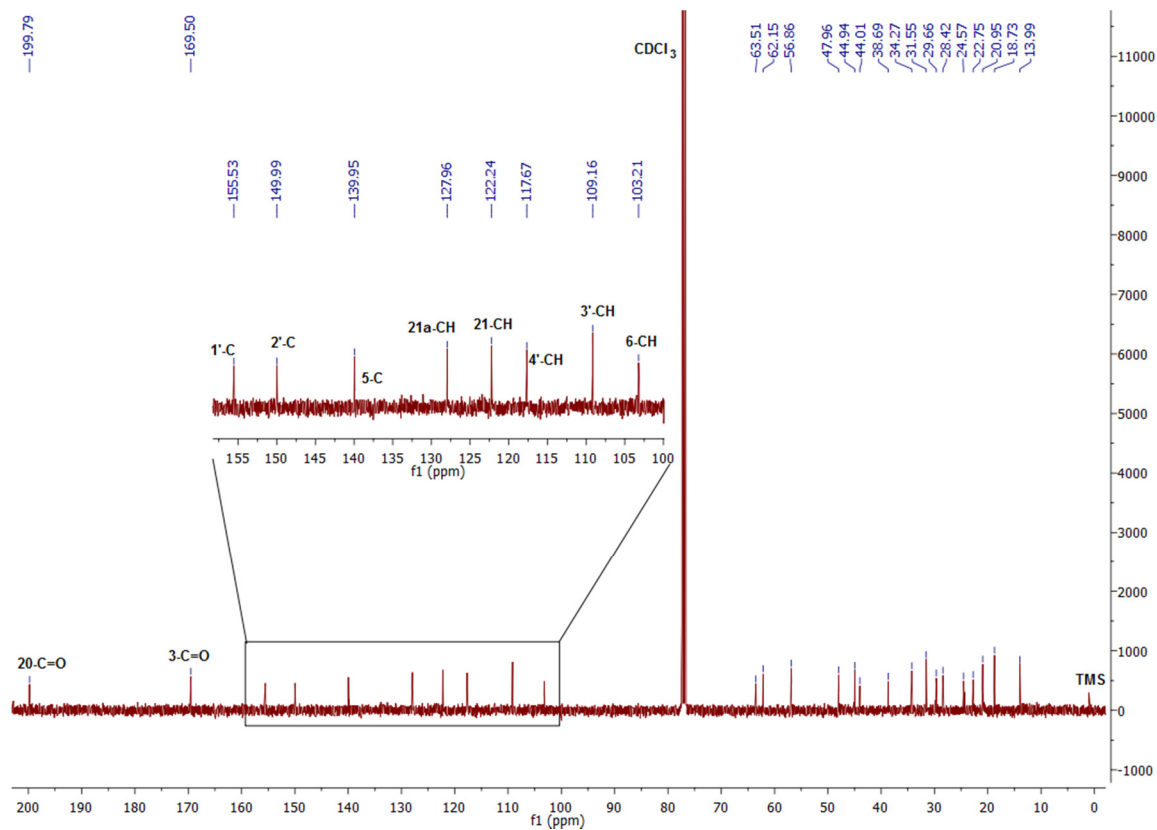

# IR spectrum of compound 3f

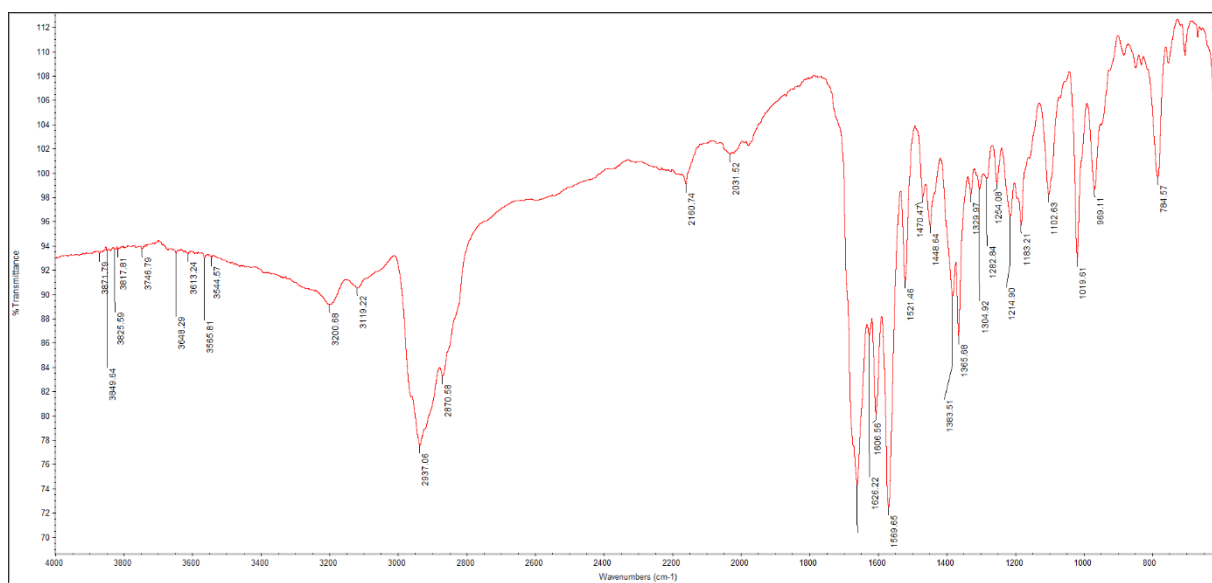

# <sup>1</sup>H NMR spectrum of compound 3g

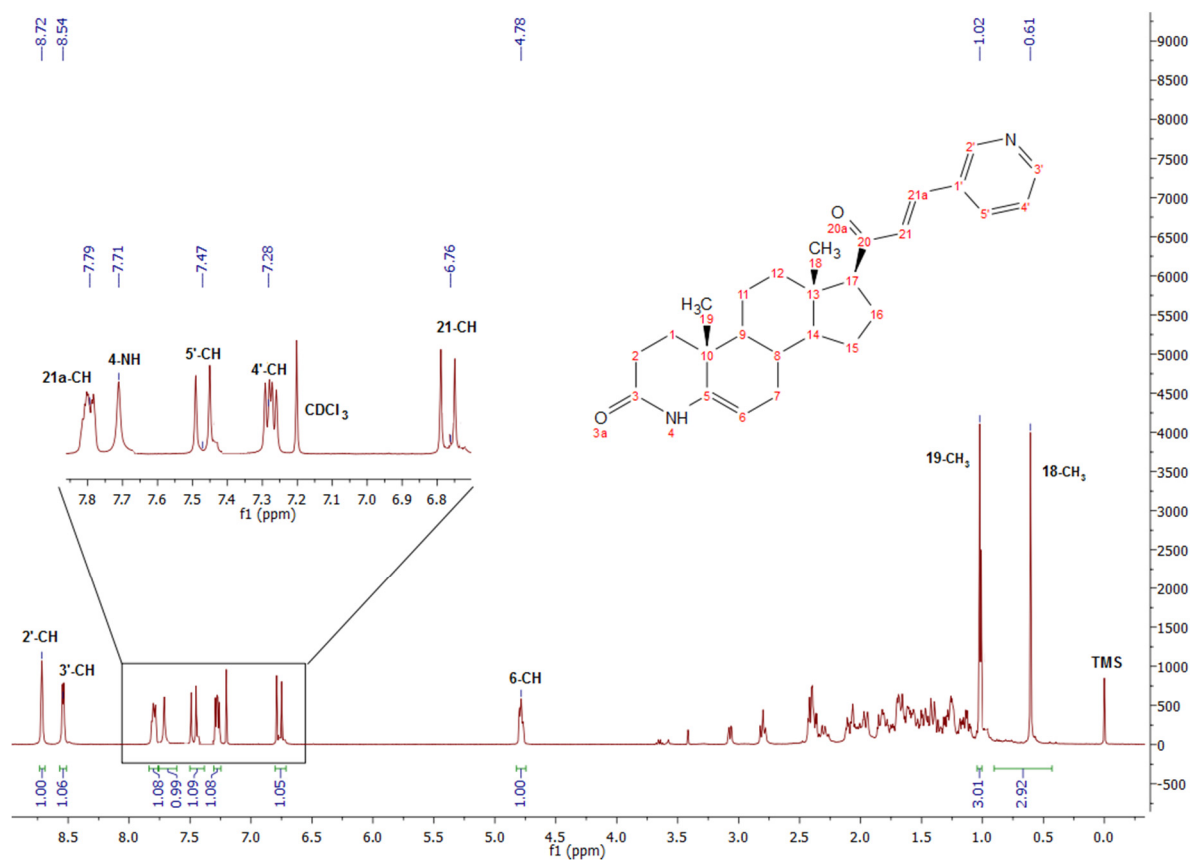

# <sup>13</sup>C NMR spectrum of compound 3g

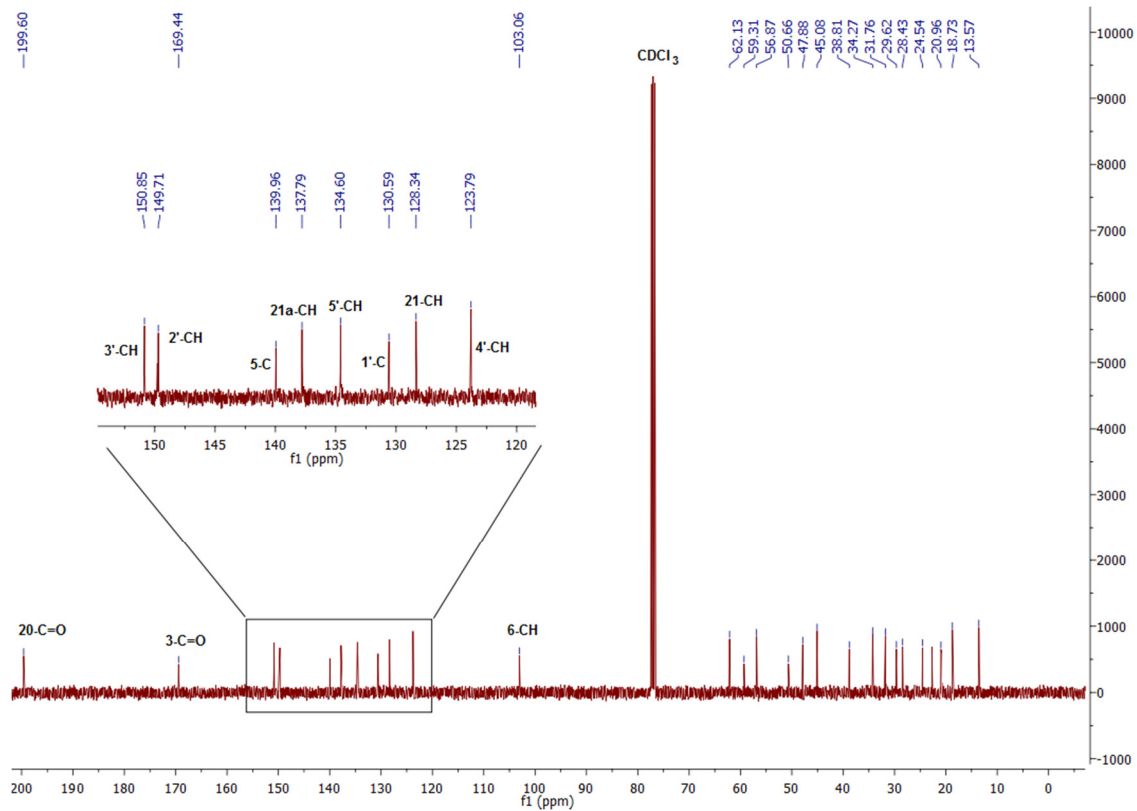

### IR spectrum of compound 3g

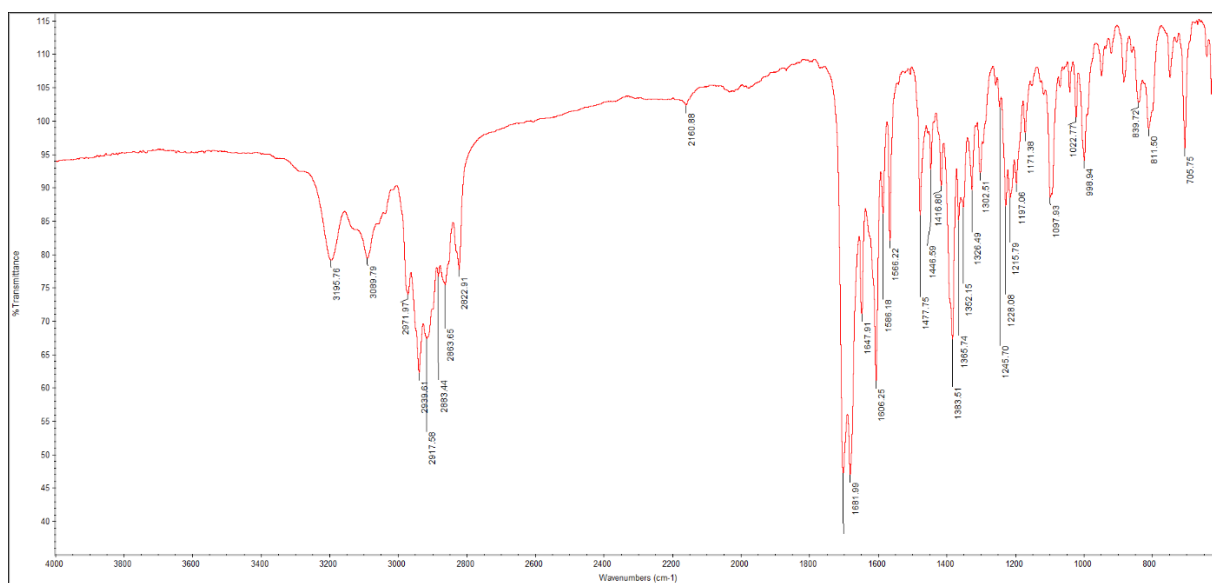

## S2. Flow cytometry additional data

Contour plots of flow cytometry assay with propidium iodide staining (for each FACS tube), in LNCaP cells after 24 and 72h of exposition to 50  $\mu$ M of steroid **3g** and finasteride (and respective controls).

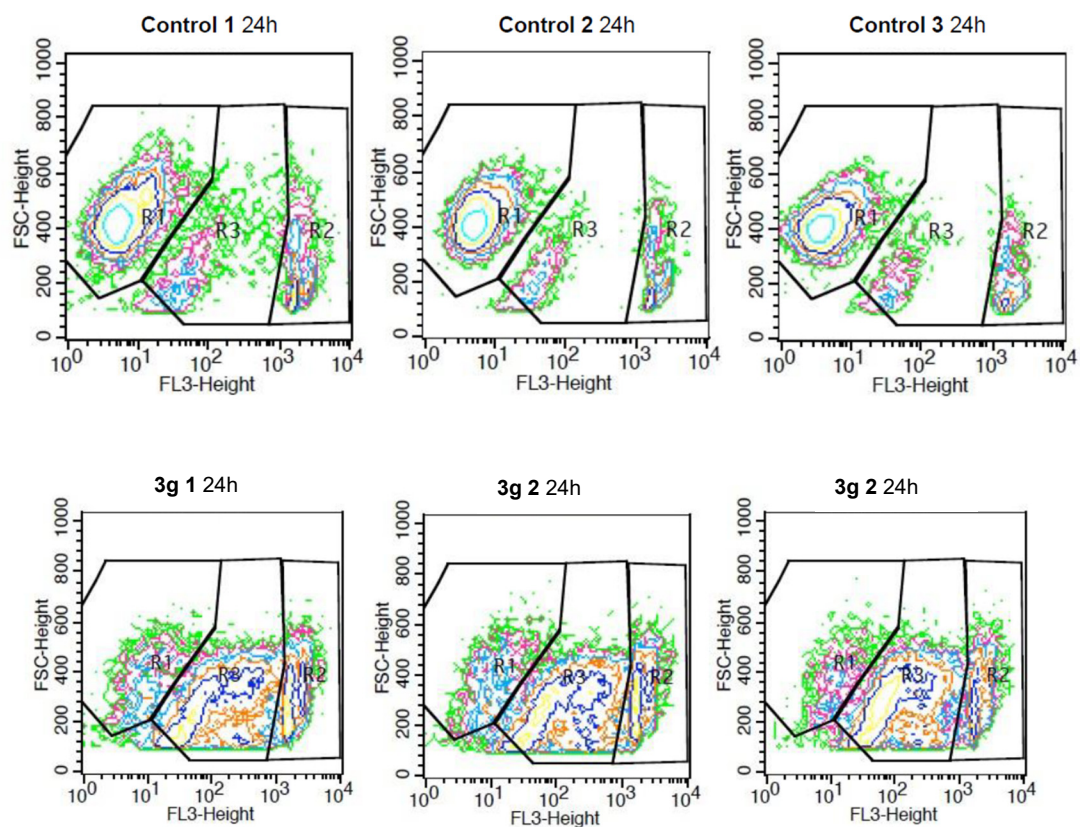



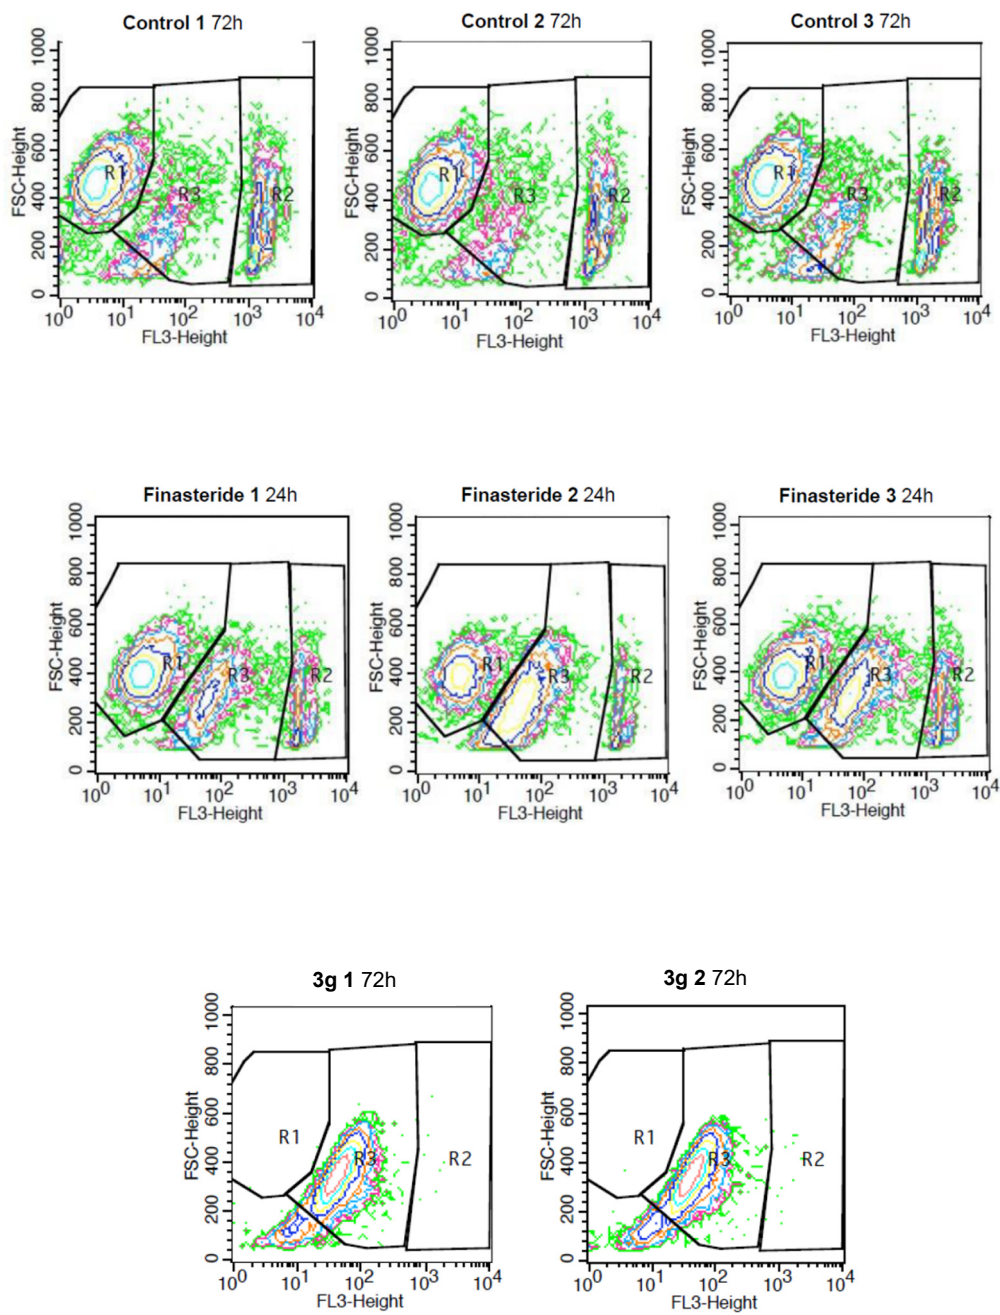

Supplement: s1 [file s1]
